# Supplementary material for: Use of Non-Saccharomyces Yeast Co-Fermentation with Saccharomyces cerevisiae to Improve the Polyphenol and Volatile Aroma Compound Contents in Nanfeng Tangerine Wines
Source: MDPI journal article supplement (doi:10.3390/jof8020128), 2022-01-27
Supplement: s1 [file s1]

**Table S1.** Chemical composition of tangerine juice and tangerine wines.

|                                 | Juice         | Sc            | Ce            | Hg            | Ht             | Ce-10-Sc       | Hg-10-Sc      | Ht-10-Sc      | Sc:Ce-1:1       | Sc:Hg-1:1     | Sc:Ht-1:1     | Sc:Ce-1:100    | Sc:Hg-1:100   | Sc:Ht-1:100   |
|---------------------------------|---------------|---------------|---------------|---------------|----------------|----------------|---------------|---------------|-----------------|---------------|---------------|----------------|---------------|---------------|
| <b>Reducing sugar (g/L)</b>     | -             | 1.56±0.13f    | 1.92±0.04ef   | 2.75±0.05b    | 2.48±0.03bc    | 0.87±0.06g     | 2.33±0.08cd   | 1.00±0.13g    | 2.05±0.21de     | 2.43±0.46bc   | 2.24±0.19cde  | 2.05±0.15de    | 2.22±0.12cde  | 3.27±0.23a    |
| <b>pH</b>                       | 4.13±0.02cd   | 4.14±0.01c    | 4.20±0.01a    | 4.17±0.01b    | 4.18±0.02ab    | 4.03±0.00i     | 3.96±0.00j    | 4.00±0.01k    | 4.11±0.01de     | 4.12±0.00cde  | 4.05±0.00hi   | 4.06±0.01gh    | 4.10±0.03ef   | 4.08±0.00fg   |
| <b>Total acidity (g/L)</b>      | 8.96±0.16g    | 9.97±0.24ef   | 10.51±0.09bcd | 10.40±0.16bcd | 10.77±0.18b    | 10.35±0.18cde  | 11.25±0.09a   | 10.72±0.28bc  | 10.61±0.24bcd   | 9.81±0.24f    | 10.24±0.32de  | 9.97±0.09ef    | 10.29±0.09de  | 10.72±0.16bc  |
| <b>flavonoids (mg/L)</b>        |               |               |               |               |                |                |               |               |                 |               |               |                |               |               |
| <b>Eriocitrin</b>               | 3.11±0.01h    | 3.46±0.01a    | 3.42±0.00bc   | 3.39±0.02cde  | 3.36±0.03fg    | 3.45±0.02ab    | 3.47±0.02a    | 3.47±0.01a    | 3.41±0.02cd     | 3.33±0.00g    | 3.38±0.01def  | 3.38±0.02ef    | 3.39±0.01cde  | 3.39±0.00cde  |
| <b>Narirutin</b>                | 24.08±0.01e   | 24.93±0.54d   | 26.08±0.23ab  | 26.34±0.47a   | 25.52±0.59bcd  | 26.13±0.08ab   | 26.35±0.29a   | 25.49±0.04bcd | 25.51±0.21bed   | 23.95±0.52e   | 25.26±0.22cd  | 25.57±0.12bed  | 25.78±0.23abc | 25.61±0.36bcd |
| <b>Hesperidin</b>               | 34.98±0.11def | 36.45±0.84abc | 37.16±0.29a   | 36.56±0.52ab  | 35.33±0.77cdef | 35.70±0.82bcde | 35.77±0.44bcd | 34.71±0.06def | 35.37±0.06bcdef | 32.97±0.37g   | 34.36±0.10f   | 34.50±1.21ef   | 34.90±0.76def | 34.42±0.30f   |
| <b>Neohesperidin</b>            | 5.21±0.06a    | 4.47±0.03ef   | 4.43±0.04efg  | 4.43±0.03efg  | 4.48±0.01de    | 4.63±0.07c     | 4.81±0.01b    | 4.80±0.01b    | 4.58±0.13cd     | 4.36±0.01g    | 4.39±0.05fg   | 4.34±0.01g     | 4.37±0.03g    | 4.39±0.02efg  |
| <b>Didymin</b>                  | 4.64±0.01d    | 4.82±0.05b    | 4.82±0.01b    | 4.78±0.04bc   | 4.74±0.03c     | 4.91±0.02a     | 4.84±0.03b    | 4.83±0.01b    | 4.73±0.02c      | 4.64±0.01d    | 4.72±0.02c    | 4.72±0.05c     | 4.73±0.03c    | 4.72±0.01c    |
| <b>Hesperetin</b>               | -             | 3.86±0.03a    | 3.51±0.06b    | 3.21±0.21fg   | 3.25±0.06efg   | 3.71±0.10a     | 3.35±0.01cdef | 3.50±0.01bc   | 3.43±0.04bcd    | 3.17±0.06g    | 3.33±0.05def  | 3.46±0.00bcd   | 3.39±0.06bcde | 3.43±0.01bcd  |
| <b>Nobiletin</b>                | -             | 0.90±0.01bc   | 0.93±0.01b    | 0.87±0.04de   | 0.86±0.01de    | 1.02±0.01a     | 0.91±0.02b    | 0.92±0.00b    | 0.79±0.02f      | 0.79±0.01f    | 0.85±0.01e    | 0.88±0.01cd    | 0.86±0.01de   | 0.92±0.01b    |
| <b>Subtotal</b>                 | 72.02±0.14d   | 78.90±1.25ab  | 80.00±0.70a   | 79.60±0.08a   | 77.32±1.42bc   | 79.54±0.93a    | 79.51±0.49a   | 77.72±0.01bc  | 77.55±0.36bc    | 73.43±0.87d   | 76.16±0.26c   | 76.76±1.33c    | 77.54±0.76bc  | 76.39±0.56c   |
| <b>phenolic acids (mg/L)</b>    |               |               |               |               |                |                |               |               |                 |               |               |                |               |               |
| <b>Protocatechuic acid</b>      | 3.15±0.00cd   | 3.40±0.04a    | 3.02±0.03e    | 2.99±0.02ef   | 3.03±0.06e     | 3.17±0.09c     | 2.89±0.02f    | 3.32±0.01ab   | 3.34±0.02ab     | 3.39±0.05a    | 3.35±0.02ab   | 3.04±0.01de    | 3.17±0.13c    | 3.26±0.10bc   |
| <b>p-Hydroxybenzoic acid</b>    | 1.63±0.00g    | 2.47±0.00a    | 2.23±0.01de   | 2.21±0.03e    | 2.19±0.04e     | 2.30±0.06c     | 2.33±0.05bc   | 2.23±0.01de   | 2.35±0.02bc     | 2.37±0.01b    | 2.32±0.04bc   | 2.10±0.02f     | 2.29±0.01cd   | 2.29±0.01cd   |
| <b>Chlorogenic acid</b>         | 17.38±0.02f   | 17.69±0.03ef  | 18.49±0.31c   | 18.08±0.11cde | 18.21±0.27cd   | 19.26±0.02b    | 19.91±0.18a   | 19.88±0.10a   | 18.48±0.25c     | 17.75±0.43def | 18.41±0.54c   | 18.38±0.02c    | 18.21±0.14cd  | 18.18±0.04cd  |
| <b>Caffeic acid</b>             | 17.65±0.02a   | 15.66±0.04e   | 16.85±0.24bcd | 16.60±0.01cd  | 16.65±0.39cd   | 16.99±0.23bc   | 16.92±0.29bcd | 16.75±0.08bcd | 16.58±0.00cd    | 15.90±0.09e   | 16.69±0.09bcd | 17.12±0.50b    | 16.66±0.16cd  | 16.55±0.08d   |
| <b>p-Coumaric acid</b>          | 9.75±0.02abc  | 9.69±0.04bcd  | 9.96±0.16a    | 9.70±0.02bcd  | 9.92±0.23ab    | 9.92±0.22ab    | 9.42±0.03e    | 9.47±0.02de   | 9.88±0.18ab     | 9.48±0.00de   | 9.62±0.05cde  | 9.48±0.01de    | 9.60±0.11cde  | 9.45±0.14e    |
| <b>Ferulic acid</b>             | 3.91±0.01a    | 3.04±0.08ef   | 2.97±0.04fg   | 3.51±0.27bc   | 3.35±0.05cd    | 3.19±0.02de    | 3.58±0.07b    | 3.23±0.02d    | 2.90±0.12fgh    | 2.97±0.02fg   | 2.98±0.10fg   | 2.78±0.02h     | 2.83±0.01gh   | 2.91±0.01fgh  |
| <b>Sinapic Acid</b>             | 4.96±0.01e    | 5.60±0.12bc   | 5.26±0.02d    | 5.54±0.20c    | 5.31±0.02d     | 5.83±0.01a     | 5.69±0.05ab   | 5.68±0.02bc   | 5.24±0.02d      | 5.26±0.07d    | 5.21±0.02d    | 5.22±0.01d     | 5.22±0.02d    | 5.21±0.01d    |
| <b>Subtotal</b>                 | 58.44±0.03bcd | 57.56±0.20ef  | 58.78±0.58b   | 58.62±0.40bc  | 58.67±0.62bc   | 60.67±0.49a    | 60.73±0.29a   | 60.56±0.07a   | 58.77±0.03b     | 57.12±0.48f   | 58.57±0.41bcd | 58.12±0.49bcde | 57.97±0.10cde | 57.84±0.13def |
| <b>Total polyphenols (mg/L)</b> | 130.46±0.12f  | 136.47±1.44cd | 138.78±1.25ab | 138.22±0.39bc | 135.99±1.89de  | 140.21±0.90a   | 140.24±0.56a  | 138.27±0.07bc | 136.32±0.39d    | 130.56±0.63f  | 134.73±0.17de | 134.89±1.15de  | 135.51±0.75de | 134.23±0.47e  |

Abbreviations: Sc, *S. cerevisiae*; Ce, *Candida ethanolica*; Hg, *Hanseniaspora guilliermondii*; Ht, *Hanseniaspora thailandica*; “-” presented no detection. Data shown are the mean ± SD of triplicate, values with different Roman letters in the same row indicated significantly different at P < 0.05 (Duncan's test).
