# Supplementary material for: Use of Non-Saccharomyces Yeast Co-Fermentation with Saccharomyces cerevisiae to Improve the Polyphenol and Volatile Aroma Compound Contents in Nanfeng Tangerine Wines
Source: MDPI journal article supplement (doi:10.3390/jof8020128), 2022-01-27
Supplement: s1 [file s1]

Table S3. Cont.

| Compounds                            | Sc             | Ce           | Hg           | Ht            | Ce-10-Sc     | Hg-10-Sc     | Ht-10-Sc     | Sc:Ce-1:1    | Sc:Hg-1:1    | Sc:Ht-1:1    | Sc:Ce-1:100  | Sc:Hg-1:100  | Sc:Ht-1:100  |
|--------------------------------------|----------------|--------------|--------------|---------------|--------------|--------------|--------------|--------------|--------------|--------------|--------------|--------------|--------------|
| <b>Aldehydes and ketones</b>         |                |              |              |               |              |              |              |              |              |              |              |              |              |
| Decanal                              | -              | 1.06±0.03    | -            | -             | -            | -            | -            | -            | -            | -            | -            | -            | -            |
| 2,5-Dimethylbenzaldehyde             | 1.48±1.48e     | 2.73±0.04c   | 5.43±0.02a   | -             | -            | -            | -            | 2.24±0.05d   | 4.63±0.06b   | 1.47±0.04c   | 1.27±0.03f   | -            | -            |
| 2-Hydroxy-5-methylacetophenone       | 12.28±12.28h   | 17.52±0.02d  | 17.69±0.09c  | 15.28±1.36g   | -            | -            | -            | 16.28±0.04f  | 22.33±0.18a  | 16.64±0.15c  | 20.28±0.10b  | -            | -            |
| <b>Phenols</b>                       |                |              |              |               |              |              |              |              |              |              |              |              |              |
| Thymol                               | 5.47±5.47c     | 5.88±0.01b   | 5.78±0.01b   | 4.22±0.89h    | 3.11±0.01i   | 4.76±0.06d   | 4.48±0.03f   | 4.42±0.01fg  | 6.36±0.09a   | 4.53±0.09ef  | 5.38±0.01c   | 4.64±0.01de  | 4.33±0.12gh  |
| 2,4-Ditert-butylphenol               | -              | -            | 1.21±0.01a   | 0.94±0.15b    | -            | -            | -            | -            | -            | -            | -            | -            | -            |
| <b>Acids</b>                         |                |              |              |               |              |              |              |              |              |              |              |              |              |
| Octanoic acid                        | -              | -            | -            | -             | 5.23±0.00b   | 11.71±0.15a  | -            | -            | -            | -            | -            | -            | -            |
| <b>Other compounds</b>               |                |              |              |               |              |              |              |              |              |              |              |              |              |
| 1,3-Xylene                           | 3.84±3.84c     | 2.82±0.06c   | 2.37±0.03g   | -             | 2.53±0.03f   | -            | -            | 6.22±0.02b   | -            | -            | -            | 7.25±0.11a   | 3.54±0.07d   |
| 1-Methyl-3-isopropylbenzene          | -              | -            | -            | 1.28±0.72a    | -            | -            | -            | -            | -            | 1.17±0.03b   | 1.10±0.05c   | -            | -            |
| 1-Isopropenyl-3-methylbenzene        | 1.11±1.11d     | 1.04±0.02d   | 1.79±0.04a   | 1.46±0.20c    | -            | -            | -            | -            | 1.57±0.07b   | 1.61±0.06b   | 1.43±0.02c   | -            | -            |
| 4-Methyl-1,5-dioxaspiro[5.5]undecane | 4.17±4.17g     | 4.71±0.01e   | 5.87±0.00c   | 5.92±0.06c    | -            | -            | -            | 3.80±0.06h   | 4.51±0.11f   | 4.94±0.11d   | 6.40±0.02b   | 11.50±0.00a  | -            |
| 4-Hydroxy-3-Methoxybenzonitrile      | -              | -            | -            | -             | 19.94±0.00c  | 28.23±0.25b  | 32.60±0.27a  | -            | -            | -            | -            | -            | 18.37±0.20d  |
| <b>Total</b>                         | 371.41±371.41i | 382.55±0.90h | 442.34±1.11g | 382.03±33.83h | 328.95±1.11j | 549.31±4.03b | 518.66±4.98c | 462.50±1.78f | 588.35±3.61a | 466.29±3.33f | 477.61±2.72c | 488.88±3.04d | 365.73±3.29i |

Abbreviations: Sc, *S. cerevisiae*; Ce, *Candida ethanolica*; Hg, *Hanseniaspora guilliermondii*; Ht, *Hanseniaspora thailandica*; “-” presented no detection. Data shown are the mean ± SD of triplicate, values with different Roman letters in the same row indicated significantly different at P < 0.05 (Duncan's test).
