# Supplementary material for: Use of Non-Saccharomyces Yeast Co-Fermentation with Saccharomyces cerevisiae to Improve the Polyphenol and Volatile Aroma Compound Contents in Nanfeng Tangerine Wines
Source: MDPI journal article supplement (doi:10.3390/jof8020128), 2022-01-27
Supplement: s1 [file s1]

**Table S4.** Volatile odor-active compounds (OAV  $\geq 1$ ) in tangerine wines.

| Compounds           | Threshold $\mu\text{g/L}$ <sup>a</sup> | Description <sup>b</sup>            | Sc                 | Ce      | Hg      | Ht      | Ce-10-Sc | Hg-10-Sc | Ht-10-Sc | Sc:Ce-1:1 | Sc:Hg-1:1 | Sc:Ht-1:1 | Sc:Ce-1:100 | Sc:Hg-1:100 | Sc:Ht-1:100 |
|---------------------|----------------------------------------|-------------------------------------|--------------------|---------|---------|---------|----------|----------|----------|-----------|-----------|-----------|-------------|-------------|-------------|
| Phenylethanol       | 14.00                                  | Rose                                | 14.09 <sup>c</sup> | 15.14   | 15.93   | 12.09   | 12.91    | 21.50    | 20.31    | 17.76     | 20.40     | 14.04     | 15.38       | 20.09       | 14.72       |
| 1-Decanol           | 0.50                                   | Fruit, sweet, flower, special fatty | 3.07               | < 1     | 2.34    | 1.78    | < 1      | < 1      | < 1      | < 1       | < 1       | < 1       | < 1         | < 1         | < 1         |
| Butyl acetate       | 1.83                                   | Fruit                               | < 1                | < 1     | < 1     | < 1     | < 1      | < 1      | 1.22     | < 1       | < 1       | < 1       | < 1         | < 1         | 1.68        |
| Isoamyl acetate     | 0.03                                   | Banana, pear                        | 263.95             | 237.85  | 1138.83 | 1844.10 | 251.70   | 1202.46  | 649.72   | 333.80    | 1705.55   | 2416.12   | 1361.07     | 79.48       | 208.56      |
| Ethyl hexanoate     | 0.01                                   | Pineapple, fruit, flower            | 271.27             | 195.57  | 2409.69 | 2348.52 | 223.73   | 2249.32  | 490.87   | 360.08    | 2433.27   | 2370.17   | 3504.71     | 2269.71     | 233.88      |
| Ethyl octanoate     | 0.00                                   | Pineapple, pear, soapy              | 3796.78            | 2559.39 | 5880.15 | 6054.90 | 0.00     | 5609.07  | 2166.07  | 3820.71   | 9984.24   | 9295.55   | 11607.23    | 3897.05     | 2624.58     |
| Ethyl phenylacetate | 0.25                                   | Honey                               | < 1                | < 1     | < 1     | < 1     | < 1      | < 1      | < 1      | < 1       | < 1       | < 1       | 4.70        | < 1         | < 1         |
| Phenethyl acetate   | 0.25                                   | Rose, honey, tobacco                | 175.02             | 193.01  | 206.05  | 169.36  | 191.20   | 288.10   | 315.67   | 234.32    | 402.19    | 250.55    | 228.53      | 260.16      | 205.15      |
| Ethyl decanoate     | 0.20                                   | Fruit, fresh                        | 111.83             | 77.45   | 77.00   | 76.41   | 45.26    | 94.45    | 43.91    | 97.62     | 131.72    | 122.87    | 121.86      | 38.05       | 44.84       |
| Ethyl laurate       | 0.50                                   | Flower and fruit aroma              | 8.84               | 10.22   | 11.12   | 9.21    | 5.44     | 12.52    | 10.07    | 9.36      | 23.73     | 17.85     | 23.11       | 3.12        | 5.53        |
| Linalool            | 0.02                                   | Flower, fruit, muscat               | 344.36             | 329.85  | 354.46  | 290.17  | 508.90   | 511.10   | 647.56   | 400.28    | 458.33    | 149.92    | 393.87      | 474.36      | 345.60      |
| 4-Terpineol         | 5.00                                   | Pepper                              | 2.46               | 2.49    | 2.75    | 2.39    | 1.69     | 2.01     | 2.41     | 3.06      | 0.00      | 2.73      | 2.79        | 3.49        | 2.41        |
| $\alpha$ -Terpineol | 9.18                                   | Flower, lemon                       | 1.94               | 2.16    | 2.34    | 1.86    | 1.79     | 2.32     | 2.54     | 2.43      | 2.77      | 2.04      | 2.34        | 2.70        | 1.61        |
| Citronellol         | 0.70                                   | Green, lemon                        | 1.75               | 1.50    | < 1     | < 1     | < 1      | < 1      | 2.51     | < 1       | < 1       | < 1       | 4.02        | < 1         | < 1         |
| Styrene             | 0.16                                   | Fruit, sweet                        | 77.86              | 51.89   | < 1     | < 1     | < 1      | < 1      | 98.98    | 150.33    | < 1       | < 1       | < 1         | 123.50      | 65.77       |
| D-Limonene          | 0.20                                   | Floral, green, tangerine            | 31.25              | 24.49   | 28.87   | 31.13   | 31.99    | 13.46    | 67.07    | 55.29     | 36.87     | 28.17     | 26.20       | 73.91       | 45.54       |
| Acetophenone        | 0.01                                   | tangerine                           | < 1                | < 1     | < 1     | 87.73   | < 1      | < 1      | < 1      | < 1       | < 1       | < 1       | < 1         | < 1         | < 1         |
| Decanal             | 0.01                                   | Sweet, tangerine, flower            | < 1                | 106.33  | < 1     | < 1     | < 1      | < 1      | < 1      | < 1       | < 1       | < 1       | < 1         | < 1         | < 1         |
| Thymol              | 0.05                                   | Thyme                               | 109.32             | 117.51  | 115.52  | 84.32   | 62.16    | 95.29    | 89.53    | 88.49     | 127.19    | 90.62     | 107.51      | 92.72       | 86.50       |
| Octanoic acid       | 10.00                                  | Rancid, harsh, cheese, fatty acid   | < 1                | < 1     | < 1     | < 1     | < 1      | 1.17     | < 1      | < 1       | < 1       | < 1       | < 1         | < 1         | < 1         |
| 1,3-Xylene          | 1.10                                   | Strong aromatic smell               | 3.49               | 2.56    | 2.15    | < 1     | 2.30     | < 1      | < 1      | 5.65      | < 1       | < 1       | < 1         | 6.59        | 3.22        |

<sup>a</sup> The threshold of volatile aroma compounds referred to Van Gemert (2011); <sup>b</sup> The description of volatile aroma compounds referred to literatures [6, 20, 26, 32]; <sup>c</sup> The OAV of the compounds. Abbreviations: Sc, *S. cerevisiae*; Ce, *Candida ethanolica*; Hg, *Hanseniaspora guilliermondii*; Ht, *Hanseniaspora thailandica*.
