# Supplementary material for: Use of Non-Saccharomyces Yeast Co-Fermentation with Saccharomyces cerevisiae to Improve the Polyphenol and Volatile Aroma Compound Contents in Nanfeng Tangerine Wines
Source: MDPI journal article supplement (doi:10.3390/jof8020128), 2022-01-27
Supplement: s1 [file s1]

**Table S2.** The standard curve, validation range and coefficient of determination ( $r^2$ ) for the non-volatile aroma compounds in tangerine wines.

| No                    | Compounds             | Standard curve         | $r^2$  | Validation range (mg/L) |
|-----------------------|-----------------------|------------------------|--------|-------------------------|
| <b>Organic acids</b>  |                       |                        |        |                         |
| 1                     | Oxalic acid           | $y = 5.5678x + 13.608$ | 0.9982 | 5-6120                  |
| 2                     | Malic acid            | $y = 0.7528x - 1.7245$ | 0.9999 | 20-1000                 |
| 3                     | Vitamin C             | $y = 8.5032x - 108.46$ | 0.9999 | 25-1000                 |
| 4                     | Lactic acid           | $y = 0.3335x - 2.2668$ | 0.9999 | 25-17000                |
| 5                     | Acetic acid           | $y = 0.3943x - 14.812$ | 0.9998 | 50-7480                 |
| 6                     | Maleic acid           | $y = 82.9x + 5.5872$   | 0.9999 | 5-100                   |
| 7                     | Citric Acid           | $y = 0.8067x + 16.424$ | 0.9999 | 50-10000                |
| 8                     | Succinic acid         | $y = 0.4433x - 1.0015$ | 0.9999 | 25-3200                 |
| 9                     | Fumaric acid          | $y = 112x - 131.65$    | 0.9980 | 1-50                    |
| <b>Phenolic acids</b> |                       |                        |        |                         |
| 10                    | Protocatechuic acid   | $y = 32.7x - 42.145$   | 0.9999 | 1.5-200                 |
| 11                    | p-Hydroxybenzoic acid | $y = 54.729x - 75.537$ | 0.9989 | 0.5-150                 |
| 12                    | Chlorogenic acid      | $y = 19.026x - 122.05$ | 0.9985 | 2.5-250                 |
| 13                    | Caffeic acid          | $y = 57.802x - 134.69$ | 0.9997 | 2-200                   |
| 14                    | p-Coumaric acid       | $y = 68.565x - 147.67$ | 0.9997 | 2-200                   |
| 15                    | Ferulic acid          | $y = 47.436x - 89.625$ | 0.9995 | 0.5-200                 |
| 16                    | Sinapic Acid          | $y = 36.101x - 140.13$ | 0.9985 | 1-250                   |
| <b>flavonoids</b>     |                       |                        |        |                         |
| 17                    | Eriocitrin            | $y = 27.672x - 40.059$ | 0.9985 | 1-150                   |
| 18                    | Narirutin             | $y = 13.859x - 5.4434$ | 0.9998 | 1-100                   |
| 19                    | Hesperidin            | $y = 15.409x + 68.192$ | 0.9983 | 1-500                   |
| 20                    | Neohesperidin         | $y = 18.133x - 26.053$ | 0.9983 | 1-107                   |
| 21                    | Didymin               | $y = 18.994x - 52.254$ | 0.9903 | 1-117.5                 |
| 22                    | Hesperetin            | $y = 18.319x - 15.997$ | 0.9994 | 1-100                   |
| 23                    | Nobiletin             | $y = 38.344x + 2.2137$ | 0.9991 | 0.5-170                 |
